# Supplementary material for: The Complete Female- and Male-Transmitted Mitochondrial Genome of Meretrix lamarckii
Source: PubMed Central journal article supplement (PMC4833323; doi:10.1371/journal.pone.0153631), 2016-04-15
Supplement: pone.0153631.s009.pdf [file pone.0153631.s009.pdf]

```
***** * ***** ***** ***** *****
MeLaF [15487] CTATTTAAAATTTTAAAATCAAACAATTTGAGACATAGTGGGGGG-CTAAAGCTTTTGTAAACAATTCTTTTATAGAGG [15564]
MeLaNC_016174 [15242] CTATTTTGAGCTTTTAAACTAAACAATTTGAGATATAGTGGGGGGGCTATAGCTTTTGTAAATAATTCTTTTATAGAGG [15321]

** ***** ** ***** ***** * ***** *****
MeLaF [15565] GAGAAAGGTGGCGTGAGAGGTAAAATTTTACGTTTTTGGTAGTGTGTTAATTTTGGTAT----- [15627]
MeLaNC_016174 [15322] GAAAAAGGTGACGTAGAAAGGTAAAATTTCTGTGTTTTTGGTGGTGTGTTAATTTTGGTGTTTAACACAA [15392]
```
