# Supplementary material for: The Complete Female- and Male-Transmitted Mitochondrial Genome of Meretrix lamarckii
Source: PubMed Central journal article supplement (PMC4833323; doi:10.1371/journal.pone.0153631), 2016-04-15
Supplement: pone.0153631.s010.pdf [file pone.0153631.s010.pdf]

```

*          *          *          *          *          *          *          *          *          *
MeLaF      GGGGGGTGGGGGTGTGTTGCAGTTAGGGTATGGAAGTAAAAAATTAAACTGTAAGTGTTTATATAGTAAATATGT
MeLaNC_016174 G-----GTTAGGGT-----TTAAACTTAGTTTATGGGCAGTTAAAGGTAATATAC
*          *          *          *          *          *          *          *          *          *
MeLaF      TTTTAGTTTAGTGGGTCGGCAGTAAA-ATAGAGGCTGG-----
MeLaNC_016174 TTTTAGTTTAGTGAGTTAGGTAGTAAATAGAAAGGGAGGAATGCTGTAGG

```
