# Supplementary material for: The Complete Female- and Male-Transmitted Mitochondrial Genome of Meretrix lamarckii
Source: PubMed Central journal article supplement (PMC4833323; doi:10.1371/journal.pone.0153631), 2016-04-15
Supplement: pone.0153631.s014.pdf [file pone.0153631.s014.pdf]

| Accession Number | Latin name                       | Taxonomy |                  |                             |
|------------------|----------------------------------|----------|------------------|-----------------------------|
|                  |                                  | Sex      | Order            | Superfamily Family          |
| NC_008452        | <i>Acanthocardia tuberculata</i> |          | Veneroida        | Cardioidea Cardiidae        |
| NC_021375        | <i>Coelomactra antiquata</i>     |          | Veneroida        | Mactroidea Mactridae        |
| NC_008451        | <i>Hiatella arctica</i>          |          | Myoida           | Hiatelloidea Hiatellidae    |
| <b>KP244451</b>  | <b><i>Meretrix lamarckii</i></b> | <b>F</b> | <b>Veneroida</b> | <b>Veneroidea Veneridae</b> |
| NC_016174        | <i>Meretrix lamarckii</i>        | F        | Veneroida        | Veneroidea Veneridae        |
| <b>KP244452</b>  | <b><i>Meretrix lamarckii</i></b> | <b>M</b> | <b>Veneroida</b> | <b>Veneroidea Veneridae</b> |
| NC_014809        | <i>Meretrix lusoria</i>          |          | Veneroida        | Veneroidea Veneridae        |
| NC_022924        | <i>Meretrix lyrata</i>           |          | Veneroida        | Veneroidea Veneridae        |
| NC_013188        | <i>Meretrix meretrix</i>         |          | Veneroida        | Veneroidea Veneridae        |
| NC_012767        | <i>Meretrix petechialis</i>      |          | Veneroida        | Veneroidea Veneridae        |
| NC_016889        | <i>Paphia amabilis</i>           |          | Veneroida        | Veneroidea Veneridae        |
| NC_014579        | <i>Paphia euglypta</i>           |          | Veneroida        | Veneroidea Veneridae        |
| NC_016890        | <i>Paphia textile</i>            |          | Veneroida        | Veneroidea Veneridae        |
| NC_016891        | <i>Paphia undulata</i>           |          | Veneroida        | Veneroidea Veneridae        |
| KP089983         | <i>Ruditapes decussatus</i>      |          | Veneroida        | Veneroidea Veneridae        |
| AB065374         | <i>Ruditapes philippinarum</i>   | M        | Veneroida        | Veneroidea Veneridae        |
| NC_003354        | <i>Ruditapes philippinarum</i>   | F        | Veneroida        | Veneroidea Veneridae        |
