# Supplementary material for: The Complete Female- and Male-Transmitted Mitochondrial Genome of Meretrix lamarckii
Source: PubMed Central journal article supplement (PMC4833323; doi:10.1371/journal.pone.0153631), 2016-04-15
Supplement: pone.0153631.s015.pdf [file pone.0153631.s015.pdf]

A ♀

| UR   | start  | stop   | Lenght |
|------|--------|--------|--------|
| UR1  | 1,825  | 1,856  | 32     |
| UR2  | 2,822  | 2,898  | 77     |
| UR3  | 3,955  | 3,996  | 42     |
| UR4  | 4,312  | 4,459  | 148    |
| UR5  | 4,524  | 4,574  | 51     |
| UR6  | 4,637  | 4,704  | 68     |
| UR7  | 6,091  | 6,161  | 71     |
| UR8  | 9,118  | 9,145  | 28     |
| UR9  | 10,481 | 10,489 | 9      |
| UR10 | 11,532 | 11,562 | 31     |
| UR11 | 11,998 | 12,062 | 65     |
| UR12 | 13,788 | 13,863 | 76     |
| UR13 | 14,386 | 14,419 | 34     |
| UR14 | 14,488 | 14,489 | 2      |
| UR15 | 14,560 | 14,629 | 70     |
| UR16 | 14,697 | 14,786 | 90     |
| UR17 | 14,857 | 14,895 | 39     |
| UR18 | 14,970 | 14,976 | 7      |
| UR19 | 15,041 | 15,099 | 59     |
| LUR  | 15,164 | 17,018 | 1,855  |
| UR21 | 17,087 | 17,211 | 125    |
| UR22 | 17,278 | 17,334 | 57     |
| UR23 | 17,401 | 17,419 | 19     |
| UR24 | 18,748 | 18,766 | 19     |
| UR25 | 18,835 | 18,872 | 38     |
| UR26 | 19,849 | 19,860 | 12     |
| UR27 | 19,934 | 20,025 | 92     |

B ♂

| UR   | start  | stop   | Lenght |
|------|--------|--------|--------|
| UR1  | 1,852  | 1,897  | 46     |
| UR2  | 2,863  | 2,881  | 19     |
| UR3  | 3,996  | 4,010  | 15     |
| UR4  | 4,305  | 4,367  | 63     |
| UR5  | 4,431  | 4,468  | 38     |
| UR6  | 4,534  | 4,537  | 4      |
| UR7  | 6,277  | 6,346  | 70     |
| UR8  | 6,415  | 6,443  | 29     |
| UR9  | 9,321  | 9,342  | 22     |
| UR10 | 10,684 | 10,690 | 7      |
| UR11 | 11,733 | 11,763 | 31     |
| UR12 | 12,199 | 12,244 | 46     |
| UR13 | 13,982 | 14,053 | 72     |
| UR14 | 14,585 | 14,615 | 31     |
| UR15 | 14,683 | 14,684 | 2      |
| UR16 | 14,755 | 14,818 | 64     |
| UR17 | 14,884 | 14,969 | 86     |
| UR18 | 15,039 | 15,068 | 30     |
| UR19 | 15,141 | 15,146 | 6      |
| UR20 | 15,211 | 15,241 | 31     |
| LUR1 | 15,306 | 15,999 | 694    |
| LUR2 | 16,067 | 16,756 | 690    |
| UR23 | 16,826 | 16,860 | 35     |
| UR24 | 16,927 | 16,971 | 45     |
| UR25 | 17,038 | 17,057 | 20     |
| UR26 | 18,379 | 18,399 | 21     |
| UR27 | 18,470 | 18,506 | 37     |
| UR28 | 19,498 | 19,508 | 11     |
| UR29 | 19,580 | 19,688 | 109    |
