# Supplementary material for: The Complete Female- and Male-Transmitted Mitochondrial Genome of Meretrix lamarckii
Source: PubMed Central journal article supplement (PMC4833323; doi:10.1371/journal.pone.0153631), 2016-04-15
Supplement: pone.0153631.s017.pdf [file pone.0153631.s017.pdf]

|                       | Accession Number | Start  | Stop   | Length | Frame | Prob  | e-value | p-value |
|-----------------------|------------------|--------|--------|--------|-------|-------|---------|---------|
| <i>M. lamarckii</i> ♀ | KP244451         | 15,627 | 15,490 | 138    | -3    | 100.0 | 7.9E-42 | 5.3E-46 |
| <i>M. lusoria</i>     | NC_014809        | 15,051 | 14,992 | 60     | -3    | 97.9  | 1.7E-06 | 1.2E-10 |
| <i>M. petechialis</i> | NC_012767        | 14,969 | 14,910 | 60     | -2    | 96.6  | 0.00042 | 2.8E-08 |
| <i>M. lamarckii</i> ♂ | KP244452         | 15,793 | 15,659 | 135    | -1    | 95.9  | 0.00079 | 5.4E-08 |
| <i>M. lyrata</i>      | NC_022924        | 15,053 | 15,009 | 45     | -2    | 92.9  | 0.014   | 9.2E-07 |
