# Supplementary material for: The Complete Female- and Male-Transmitted Mitochondrial Genome of Meretrix lamarckii
Source: PubMed Central journal article supplement (PMC4833323; doi:10.1371/journal.pone.0153631), 2016-04-15
Supplement: pone.0153631.s018.pdf [file pone.0153631.s018.pdf]

| tRNA             | Jin-Nei distance |
|------------------|------------------|
| <i>trnA</i>      | 36.15            |
| <i>trnR</i>      | 14.99            |
| <i>trnN</i>      | 26.37            |
| <i>trnD</i>      | 28.22            |
| <i>trnC</i>      | 36.31            |
| <i>trnQ</i>      | 24.04            |
| <i>trnE</i>      | 26.32            |
| <i>trnG</i>      | 67.68            |
| <i>trnH</i>      | 19.72            |
| <i>trnI</i>      | 10.66            |
| <i>trnL(NAA)</i> | 39.69            |
| <i>trnL(NAG)</i> | 39.65            |
| <i>trnK</i>      | 19.72            |
| <i>trnM</i>      | 28.66            |
| <i>trnF</i>      | 33.49            |
| <i>trnP</i>      | 12.70            |
| <i>trnS(NCT)</i> | 4.84             |
| <i>trnS(NGA)</i> | 10.15            |
| <i>trnT</i>      | 58.64            |
| <i>trnW</i>      | 20.11            |
| <i>trnY</i>      | 20.03            |
| <i>trnV</i>      | 26.76            |
